# Supplementary material
Source: Copernicus journal article supplement (doi:10.5194/essd-2025-802)
Supplement: Supplementary file [file essd-2025-802-RC2-supplement.pdf]

## **Referee's comment on essd-2025-802**

### **General comments**

This paper provides a rigorous and comprehensive description of the GLOVE experiment. The science goals and the technical details of the dataset are well described. The documentation of the uncertainties is also commendable. The writing is clear, although it may be improved by removing some of the acronyms that are not strictly necessary or are used only once. The paper is recommended for publication after addressing very minor comments.

### **Specific comments**

L101: "30m" should be "30-m".

L120: Please justify through a reference that the CPL represents the gold standard for cloud detection.

Tables 1,2,3: Please add scanning direction if available.

Table 4: Please define 4,5,6 objectives.

L 352: It would be beneficial to comment on the implication of having limited data during nighttime.

Please make the fonts consistent among the different figures.
